# Supplementary material
Source: publisher figshare collection journal article supplement (https://geolsoc.figshare.com/articles/dataset/_/3453569)
Supplement: Supplementary file 1 [file 1]

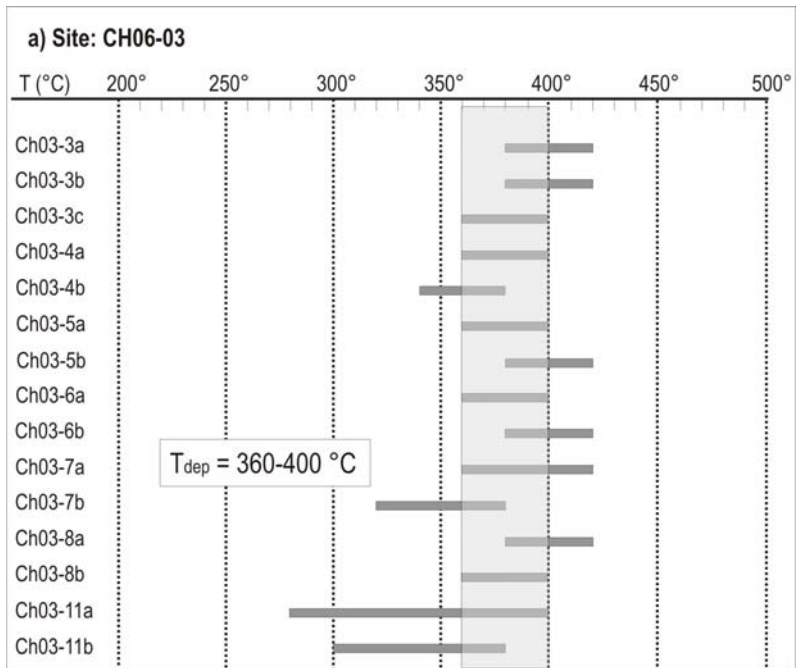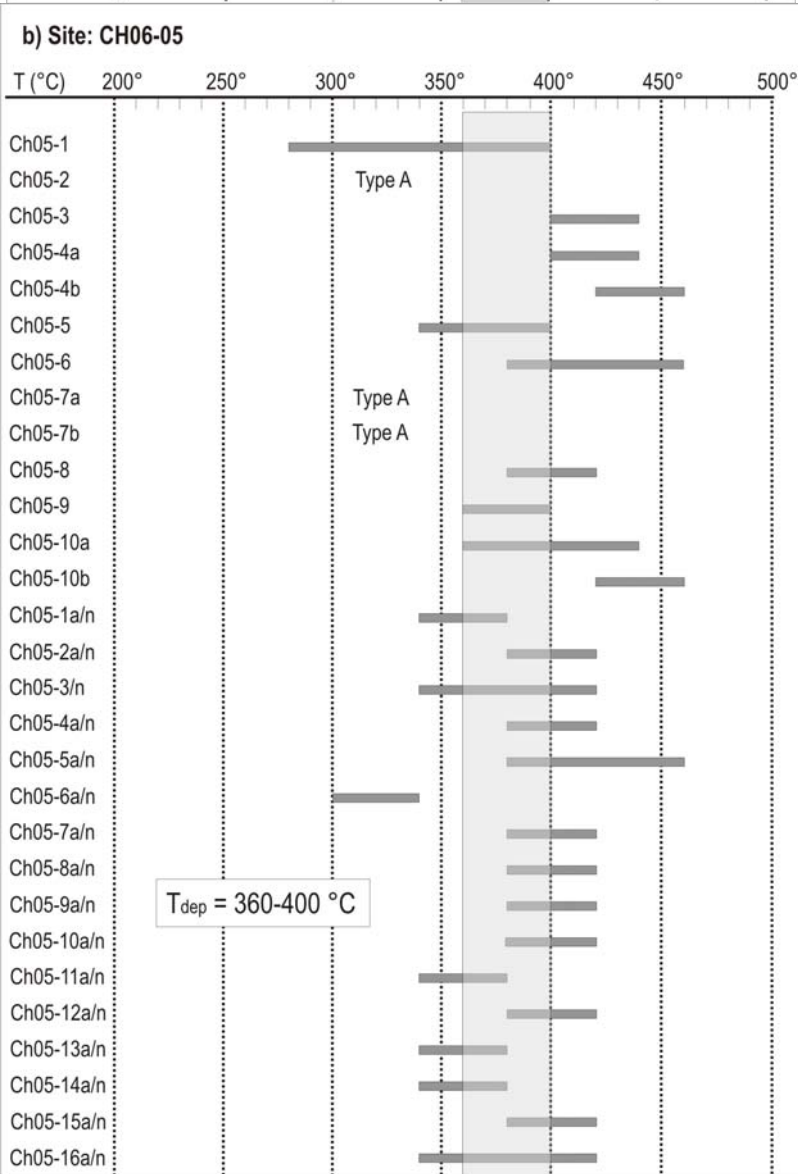

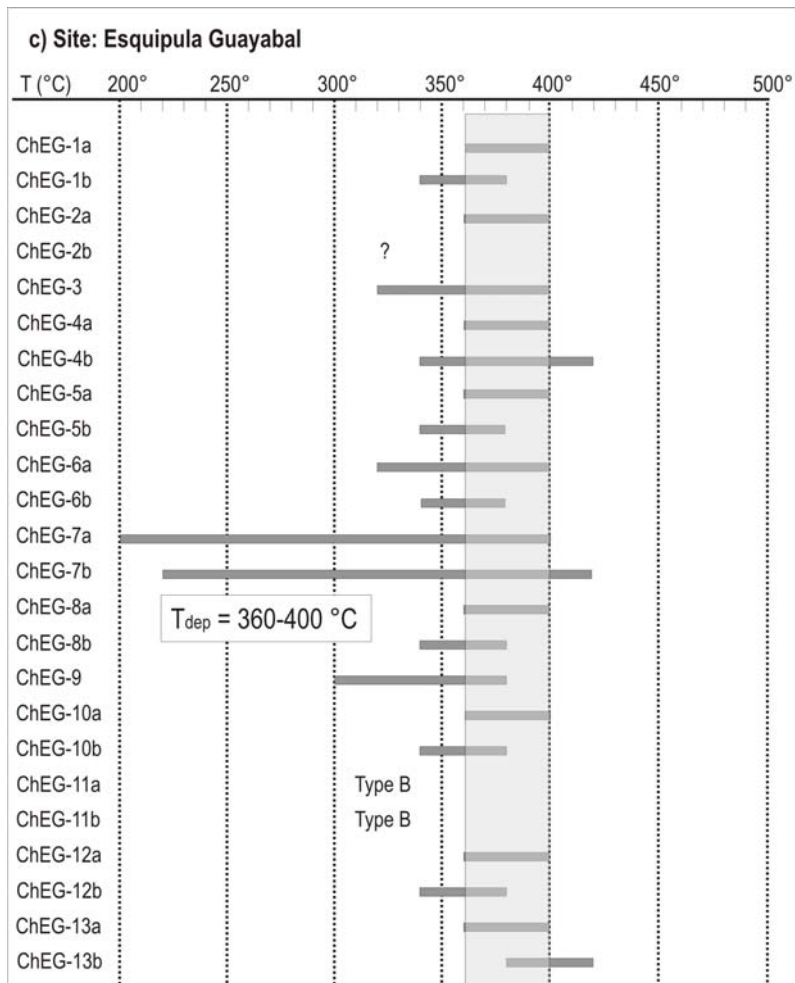

Site:  
CHI9260  
PS3

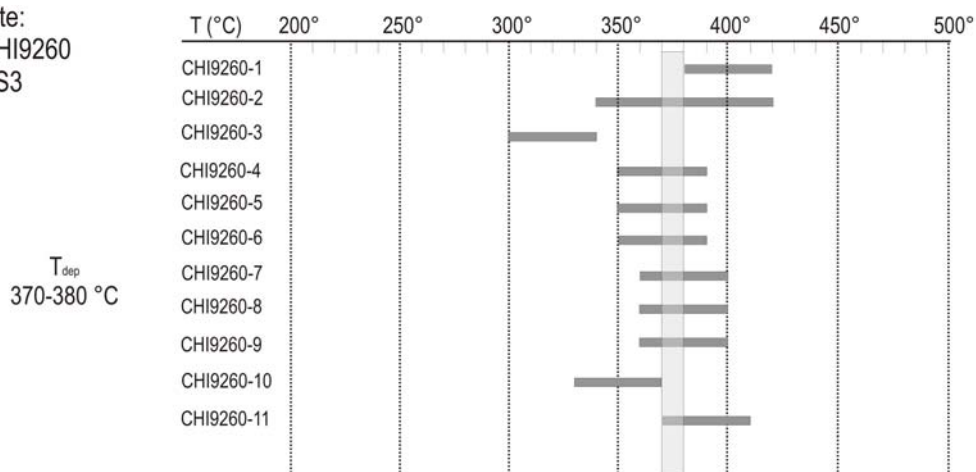

| Specimen | Lithology | T (°C)  | Type | Between-component angle (°) | remanent J/Jo % | Secondary component direction |
|----------|-----------|---------|------|-----------------------------|-----------------|-------------------------------|
| CH9a-1   | lava      | 380-420 | C    | 101                         | 35              | not oriented                  |
| CH9a-2   | lava      | 340-420 | D3   | 19                          | 30              | not oriented                  |
| CH9a-3   | lava      | 300-340 | C    | 32                          | 54              | not oriented                  |
| CH9a-4   | lava      | 350-390 | C    | 87                          | 29              | not oriented                  |
| CH9a-5   | lava      | 350-390 | C    | 123                         | 89              | not oriented                  |
| CH9a-6   | lava      | 350-390 | C    | 115                         | 80              | not oriented                  |
| CH9a-7   | lava      | 360-400 | C    | 27                          | 51              | not oriented                  |
| CH9a-8   | lava      | 360-400 | D3   | ?                           | 75              | not oriented                  |
| CH9a-9   | lava      | 360-400 | D3   | ?                           | 92              | not oriented                  |
| CH9a-10  | lava      | 330-370 | C    | 34                          | 40              | not oriented                  |
| Ch9a-11  | lava      | 370-410 | C    | 94                          | 43              | not oriented                  |

Site:  
CHI9253  
PS3

$T_{dep}$   
410-420 °C

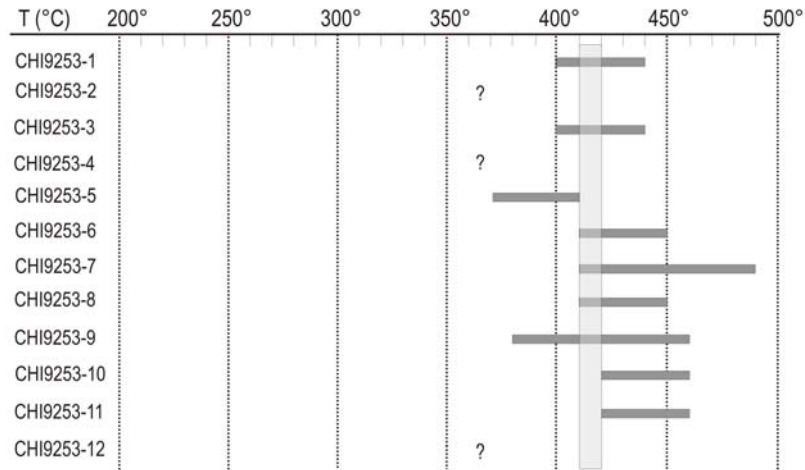

| Specimen   | Lithology | T (°C)  | Type | Between-component angle (°) | remanent J/J <sub>0</sub> % | Secondary component direction |
|------------|-----------|---------|------|-----------------------------|-----------------------------|-------------------------------|
| CHI9253-1  | lava      | 400-440 | D3   | ?                           | 96                          | not oriented                  |
| CHI9253-2  | lava      | ?       | D3   | ?                           | --                          | not oriented                  |
| CHI9253-3  | lava      | 400-440 | C    | 180                         | 88                          | not oriented                  |
| CHI9253-4  | lava      | ?       | ?    | ?                           | --                          | not oriented                  |
| CHI9253-5  | lava      | 370-410 | C    | 21                          | 82                          | not oriented                  |
| CHI9253-6  | lava      | 410-450 | C    | 68                          | 75                          | not oriented                  |
| CHI9253-7  | lava      | 410-490 | D3   | 88                          | 82                          | not oriented                  |
| CHI9253-8  | lava      | 410-450 | C    | ?                           | 82                          | not oriented                  |
| CHI9253-9  | lava      | 380-460 | D1   | 33                          | 52                          | not oriented                  |
| CHI9253-10 | lava      | 420-460 | C    | 90                          | 98                          | not oriented                  |
| CHI9253-11 | lava      | 420-460 | C    | 27                          | 83                          | not oriented                  |
| CHI9253-12 | lava      | ?       | ?    | ?                           | --                          | not oriented                  |

Site:  
CHI9256  
Section 24  
Ps3

$T_{dep}$   
410-420 °C

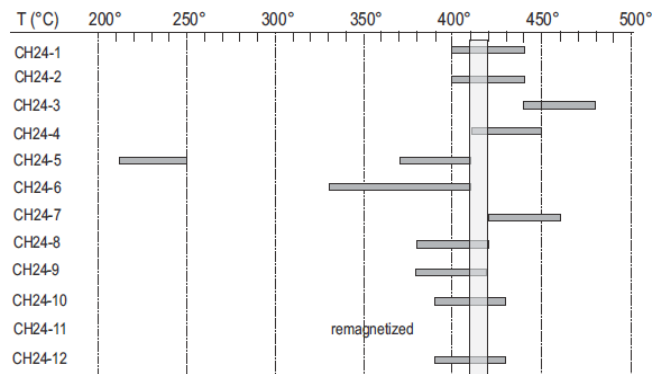

| Specimen | Lithology | T (°C)          | Type         | Between-component angle (°) | remanent J/J <sub>0</sub> % | Secondary component direction |
|----------|-----------|-----------------|--------------|-----------------------------|-----------------------------|-------------------------------|
| CH24-1   | lava      | 400-440         | D3           | ?                           | 19                          | not oriented                  |
| CH24-2   | lava      | 400-440         | C            | 87                          | 94                          | not oriented                  |
| CH24-3   | lava      | 440-480         | D3           | 159                         | 78                          | not oriented                  |
| CH24-4   | lava      | 410-450         | C            | 62                          | 76                          | not oriented                  |
| CH24-5   | lava      | 210-250/370-410 | D3           | 92                          | 40                          | not oriented                  |
| CH24-6   | lava      | 330-410         | D2           | 51                          | 51                          | not oriented                  |
| CH24-7   | lava      | 420-460         | C            | 123                         | 90                          | not oriented                  |
| CH24-8   | lava      | 380-420         | D3           | 169                         | 50                          | not oriented                  |
| CH24-9   | lava      | 380-420         | C            | 66                          | 62                          | not oriented                  |
| CH24-10  | lava      | 390-430         | D3           | ?                           | 18                          | not oriented                  |
| CH24-11  | lava      |                 | remagnetized |                             |                             | not oriented                  |
| CH24-12  | lava      | 390-430         | D3           | 47                          | 64                          | not oriented                  |

Site:  
CHI92189x  
PS3

$T_{dep}$   
360-370 °C

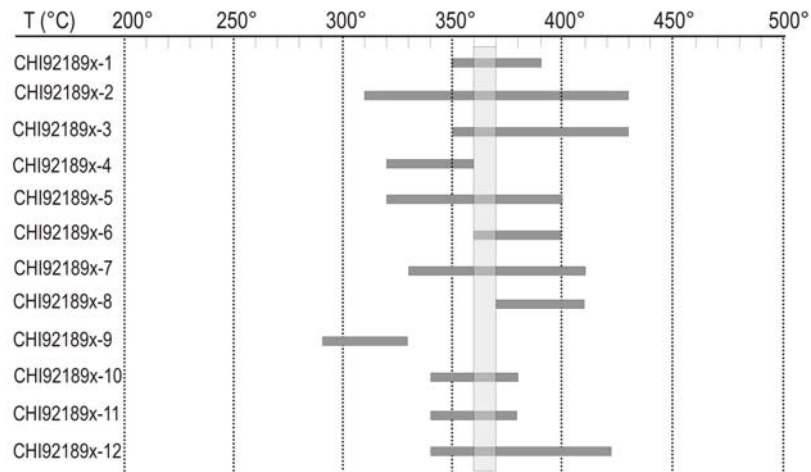

| Specimen | Lithology | T (°C)  | Type | Between-component angle (°) | remanent J/Jo % | Secondary component direction |
|----------|-----------|---------|------|-----------------------------|-----------------|-------------------------------|
| Ch32-1   | lava      | 350-390 | D3   | ?                           | 69              | not oriented                  |
| Ch32-2   | lava      | 310-430 | D3   | 70                          | 80              | not oriented                  |
| Ch32-3   | lava      | 350-430 | D3   | ?                           | 69              | not oriented                  |
| Ch32-4   | lava      | 320-360 | C    | 93                          | 90              | not oriented                  |
| Ch32-5   | lava      | 320-400 | D3   | ?                           | 36              | not oriented                  |
| Ch32-6   | lava      | 360-400 | C    | 89                          | 74              | not oriented                  |
| Ch32-7   | lava      | 330-410 | C    | 100                         | 83              | not oriented                  |
| Ch32-8   | lava      | 370-410 | C    | 45                          | 90              | not oriented                  |
| Ch32-9   | lava      | 290-330 | C    | 86                          | 73              | not oriented                  |
| Ch32-10  | lava      | 340-380 | D3   | ?                           | 96              | not oriented                  |
| Ch32-11  | lava      | 340-380 | D3   | ?                           | 84              | not oriented                  |
| Ch32-12  | lava      | 340-420 | D3   | ?                           | 88              | not oriented                  |

Site:  
CHI9285  
Section 43  
Ps1

$T_{dep}$   
360-380 °C

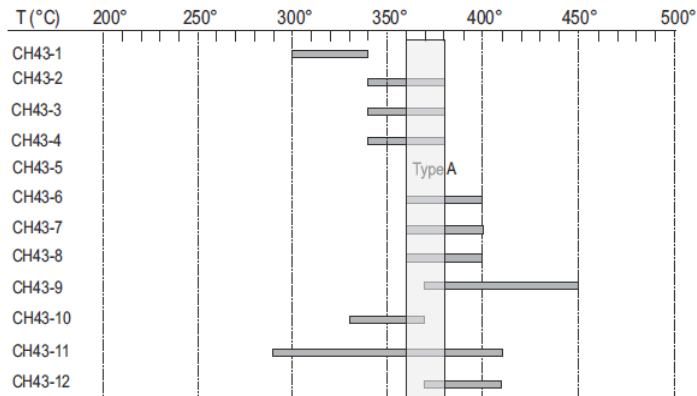

| Specimen | Lithology | T (°C)   | Type | Between-component angle (°) | remanent J/Jo % | Secondary component direction |
|----------|-----------|----------|------|-----------------------------|-----------------|-------------------------------|
| CH43-1   | lava      | 300-340  | C    | 31                          | 86              | not oriented                  |
| CH43-2   | lava      | 340-380? | D3   | ?                           | 28              | not oriented                  |
| CH43-3   | lava      | 340-380? | D3   | ?                           | 60              | not oriented                  |
| CH43-4   | lava      | 340-380  | C    | 92                          | 34              | not oriented                  |
| CH43-5   | lava      | -        | A    | -                           | -               | not oriented                  |
| CH43-6   | lava      | 360-400  | D3   | 72                          | 64              | not oriented                  |
| CH43-7   | lava      | 360-400  | D1   | 100                         | 59              | not oriented                  |
| CH43-8   | lava      | 360-400  | C    | 81                          | 58              | not oriented                  |
| CH43-9   | lava      | 370-450  | D1   | ?                           | 75              | not oriented                  |
| CH43-10  | lava      | 330-370  | C    | 38                          | 52              | not oriented                  |
| CH43-11  | lava      | 290-410  | D1   | 15                          | 63              | not oriented                  |
| CH43-12  | lava      | 370-410  | D3   | 89                          | 72              | not oriented                  |

Site:  
CHI92123  
BAF1

$T_{dep}$   
410-420 °C

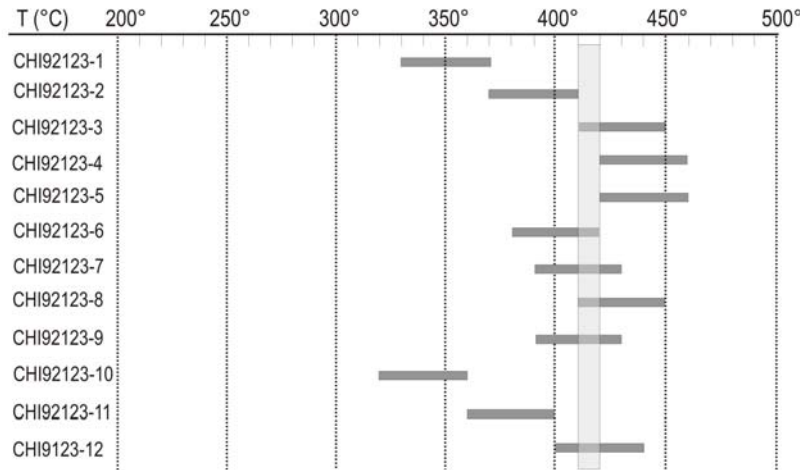

| Specimen | Lithology | T (°C)  | Type | Between-component angle (°) | remanent JJo % | Secondary component direction |
|----------|-----------|---------|------|-----------------------------|----------------|-------------------------------|
| CH51-1   | lava      | 330-370 | C    | 37                          | 7              | not oriented                  |
| CH51-2   | lava      | 370-410 | C    | 27                          | 8              | not oriented                  |
| CH51-3   | lava      | 410-450 | D2   | ?                           | 21             | not oriented                  |
| CH51-4   | lava      | 420-460 | C    | 101                         | 77             | not oriented                  |
| CH51-5   | lava      | 420-460 | D3   | ?                           | 26             | not oriented                  |
| CH51-6   | lava      | 380-420 | D3   | 41                          | 47             | not oriented                  |
| CH51-7   | lava      | 390-430 | D3   | 10                          | 33             | not oriented                  |
| CH51-8   | lava      | 410-450 | D3   | ?                           | 47             | not oriented                  |
| CH51-9   | lava      | 390-430 | D1   | 8                           | 28             | not oriented                  |
| CH51-10  | lava      | 320-360 | D3   | 32                          | 7              | not oriented                  |
| CH51-11  | lava      | 360-400 | C    | 70                          | 29             | not oriented                  |
| CH51-12  | lava      | 400-440 | C    | 38                          | 81             | not oriented                  |

Site:  
CHI9314  
PF2/PS2

$T_{dep}$   
380-390 °C

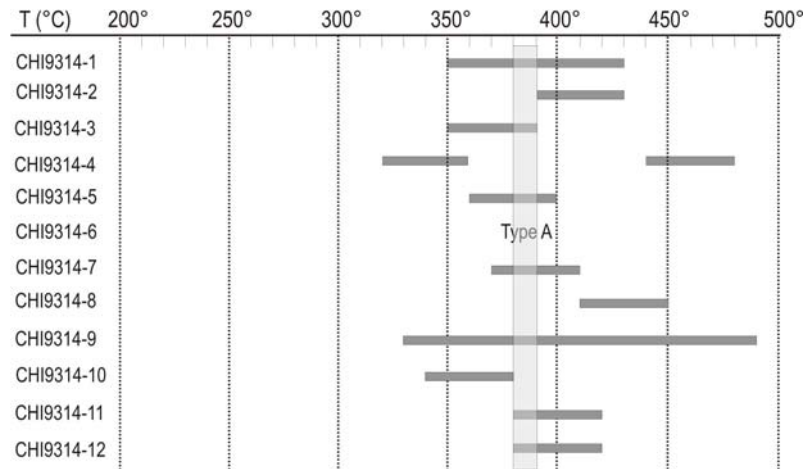

| Specimen | Lithology | T (°C)          | Type | Between-component angle (°) | remanent JJo % | Secondary component direction |
|----------|-----------|-----------------|------|-----------------------------|----------------|-------------------------------|
| CH952-1  | lava      | 350-430         | D3   | ?                           | 93             | not oriented                  |
| CH952-2  | lava      | 390-430         | C    | 165                         | 58             | not oriented                  |
| CH952-3  | lava      | 350-390         | D3   | ?                           | 84             | not oriented                  |
| CH952-4  | lava      | 320-360/440-480 | C    | 99                          | 86/67          | not oriented                  |
| CH952-5  | lava      | 360-400         | C    | 120                         | 84             | not oriented                  |
| CH952-6  | lava      | --              | A    | --                          | --             | not oriented                  |
| CH952-7  | lava      | 370-410         | D3   | ?                           | 93             | not oriented                  |
| CH952-8  | lava      | 410-450         | D3   | 57                          | 47             | not oriented                  |
| CH952-9  | lava      | 330-490         | D3   | 97                          | 95             | not oriented                  |
| CH952-10 | lava      | 340-380         | D2   | 29                          | 18             | not oriented                  |
| CH952-11 | lava      | 380-420         | D2   | 72                          | 24             | not oriented                  |
| CH952-12 | lava      | 380-420         | C    | 119                         | 21             | not oriented                  |

Site:  
CHI9316  
PF2/PS2

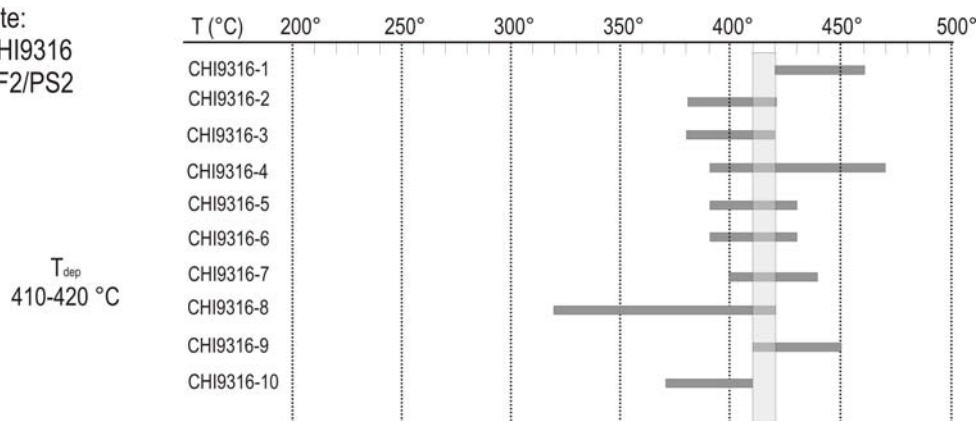

| Specimen | Lithology | T (°C)  | Type | Between-component angle (°) | remanent J/Jo % | Secondary component direction |
|----------|-----------|---------|------|-----------------------------|-----------------|-------------------------------|
| CH962-1  | lava      | 420-460 | C    | ?                           | 49              | not oriented                  |
| CH962-2  | lava      | 380-420 | C    | 90                          | 97              | not oriented                  |
| CH962-3  | lava      | 380-420 | D3   | 43                          | 72              | not oriented                  |
| CH962-4  | lava      | 390-470 | D3   | ?                           | 93              | not oriented                  |
| CH962-5  | lava      | 390-430 | C    | 40                          | 90              | not oriented                  |
| CH962-6  | lava      | 390-430 | C    | 97                          | 85              | not oriented                  |
| CH962-7  | lava      | 400-440 | C    | 92                          | 94              | not oriented                  |
| CH962-8  | lava      | 320-420 | C    | 125                         | 92              | not oriented                  |
| CH962-9  | lava      | 410-450 | C    | 67                          | 94              | not oriented                  |
| CH962-10 | lava      | 370-410 | C    | 88                          | 94              | not oriented                  |

Site:  
CHI9315  
Section 96  
BAF 1

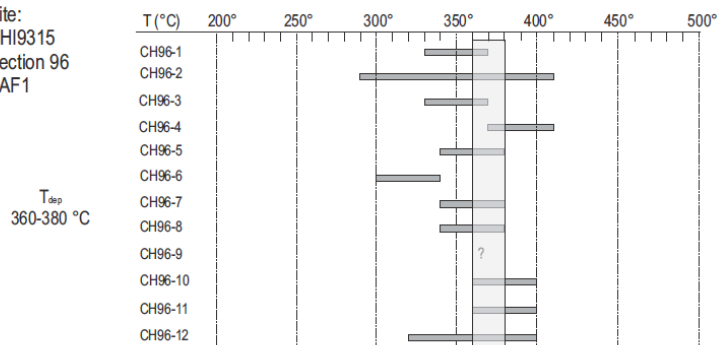

| Specimen | Lithology | T (°C)   | Type | Between-component angle (°) | remanent J/Jo % | Secondary component direction |
|----------|-----------|----------|------|-----------------------------|-----------------|-------------------------------|
| CH96-1   | lava      | 330-370  | D3   | ?                           | 30              | not oriented                  |
| CH96-2   | lava      | 290-410  | D3   | ?                           | 32              | not oriented                  |
| CH96-3   | lava      | 330-370  | C    | 23                          | 62              | not oriented                  |
| CH96-4   | lava      | 370-410  | C    | 88                          | 53              | not oriented                  |
| CH96-5   | lava      | 340-380  | D3   | ?                           | 59              | not oriented                  |
| CH96-6   | lava      | 300-340  | C    | 79                          | 94              | not oriented                  |
| CH96-7   | lava      | 340-380  | C    | 94                          | 70              | not oriented                  |
| CH96-8   | lava      | 340-380  | C    | 121                         | 72              | not oriented                  |
| CH96-9   | lava      | ?        | D3   | ?                           | --              | not oriented                  |
| CH96-10  | lava      | 360-400  | C    | 70                          | 87              | not oriented                  |
| CH96-11  | lava      | 360-400? | D3   | 187                         | 30              | not oriented                  |
| CH96-12  | lava      | 320-400  | D3   | 60                          | 93              | not oriented                  |
