# Supplementary material
Source: publisher figshare collection journal article supplement (https://geolsoc.figshare.com/articles/dataset/_/3453569)
Supplement: Supplementary file 2 [file 1]

Site:  
CMI

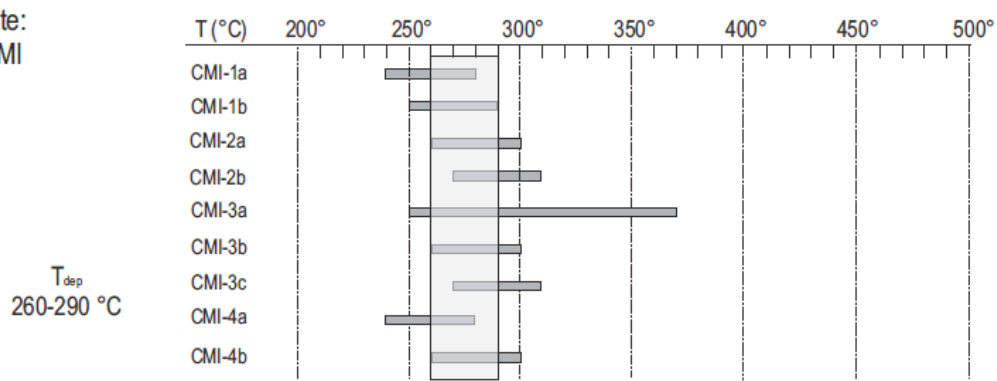

| Specimen | Lithology | T (°C)            | Type | Between-component angle (°) | J/jr | Secondary component direction |
|----------|-----------|-------------------|------|-----------------------------|------|-------------------------------|
| CMI-1a   | lava      | 240-280 (440-480) | C    | 91                          | 85   | 344, 35 (20-240)              |
| CMI-1b   | lava      | 250-290 (370-410) | C    | 96                          | 73   | 353, 33 (20-290)              |
| CMI-2a   | lava      | 260-300           | D2   | 14                          | 37   | 12, 50 (140-260)              |
| CMI-2b   | lava      | 270-310           | D2   | 18                          | 38   | 8, 42 (20-270)                |
| CMI-3a   | lava      | 250-370           | D1   | 60                          | 28   | 5, 48 (20-250)                |
| CMI-3b   | lava      | 260-300           | C    | 51                          | 1    | 358, 44 (20-260)              |
| CMI-3c   | lava      | 270-310           | D3   | 48                          | 2    | 11, 58 (20-270)               |
| CMI-4a   | lava      | 240-280           | C    | 127                         | 22   | 15, 48 (20-260)               |
| CMI-4b   | lava      | 260-300           | C    | 124                         | 20   | not determined                |

Site:  
CMS

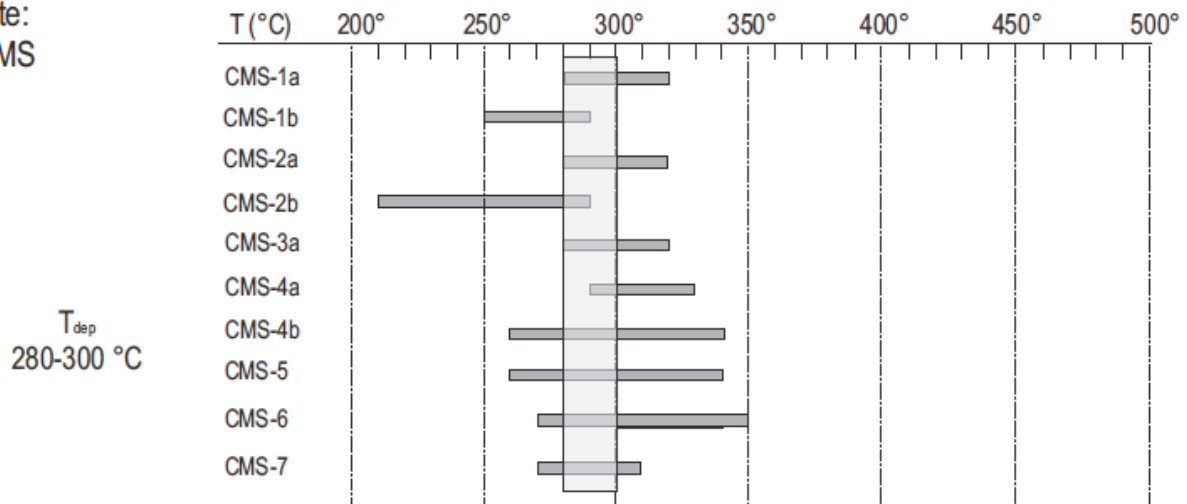

| Specimen | Lithology | T (°C)  | Type | Between-component angle (°) | J/jr | Secondary component direction |
|----------|-----------|---------|------|-----------------------------|------|-------------------------------|
| CMS-1a   | lava      | 280-320 | D3   | 119                         | 49   | 4, 20 (120-280)               |
| CMS-1b   | lava      | 250-290 | D3   | 104                         | 58   | 348, 26 (90-250)              |
| CMS-2a   | lava      | 280-320 | C    | 71                          | 13   | 17, 40 (120-280)              |
| CMS-2b   | lava      | 210-290 | D1   | 27                          | 28   | 359, 47 (20-170)              |
| CMS-3a   | lava      | 280-320 | C    | 88                          | 2    | 24, 49 (20-280)               |
| CMS-4a   | lava      | 290-330 | D2   | 61                          | 8    | not determined                |
| CMS-4b   | lava      | 260-340 | D2   | ?                           | 7    | 15, 46 (20-180)               |
| CMS-5    | lava      | 260-340 | C    | 107                         | 38   | not oriented                  |
| CMS-6    | lava      | 270-350 | D3   | 103                         | 1    | not oriented                  |
| CMS-7    | lava      | 270-310 | C    | 98                          | 63   | 7, 52 (20-270)                |

Site:  
Co13

$T_{dep}$   
280-300 °C

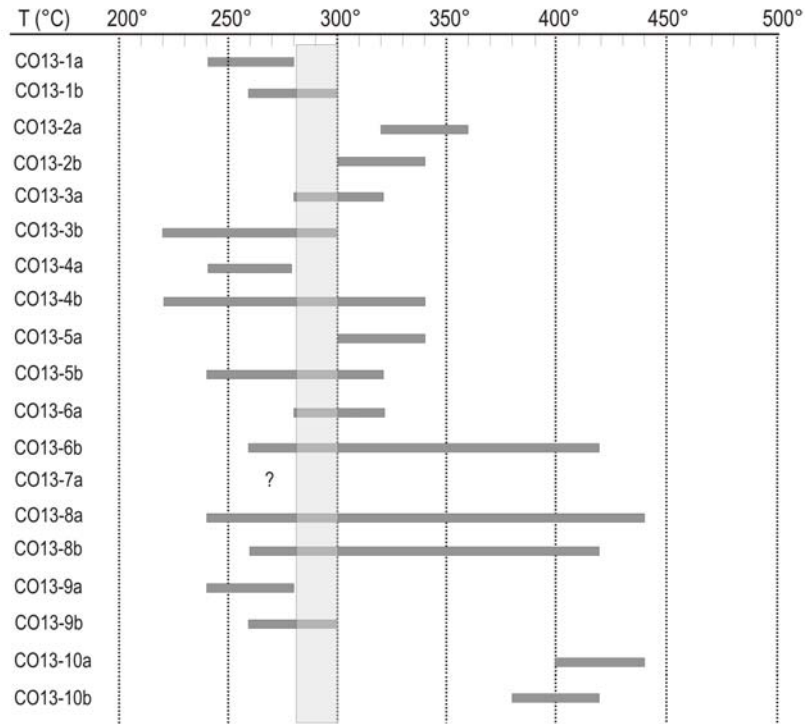

| Specimen | Lithology | T (°C)          | Type | Between-component angle (°) | Secondary component direction |
|----------|-----------|-----------------|------|-----------------------------|-------------------------------|
| CO13-1a  | lava      | 240-280         | C    | 37                          | not oriented                  |
| CO13-1b  | lava      | 260-300         | C    | 53                          | not oriented                  |
| CO13-2a  | lava      | 320-360/480-520 | C    | 84                          | not oriented                  |
| CO13-2b  | lava      | 300-340/460-500 | C    | 86                          | not oriented                  |
| CO13-3a  | lava      | 280-320         | C/D1 | 22                          | not oriented                  |
| CO13-3b  | lava      | 220-300?        | D2   | 19                          | not oriented                  |
| CO13-4a  | lava      | 240-280         | D2   | 14                          | not oriented                  |
| CO13-4b  | lava      | 220-340         | D1   | 20                          | not oriented                  |
| CO13-5a  | lava      | 240-320         | D1   | 31                          | not oriented                  |
| CO13-5b  | lava      | 260-340         | D1   | 27                          | not oriented                  |
| CO13-6a  | lava      | 280-320         | C    | 69                          | not oriented                  |
| CO13-6b  | lava      | 260-420         | D3   | ?                           | not oriented                  |
| CO13-7a  | lava      | ?               | D1   | ?                           | not oriented                  |
| CO13-8a  | lava      | 240-440         | D1   | 42                          | not oriented                  |
| CO13-8b  | lava      | 260-420         | D1   | 61                          | not oriented                  |
| CO13-9a  | lava      | 240-280         | C    | 64                          | not oriented                  |
| CO13-9b  | lava      | 260-300/380-420 | C    | 28                          | not oriented                  |
| CO13-10a | lava      | 400-440         | C    | 58                          | not oriented                  |
| CO13-10b | lava      | 380-420         | C    | 81                          | not oriented                  |

Site:  
LB01

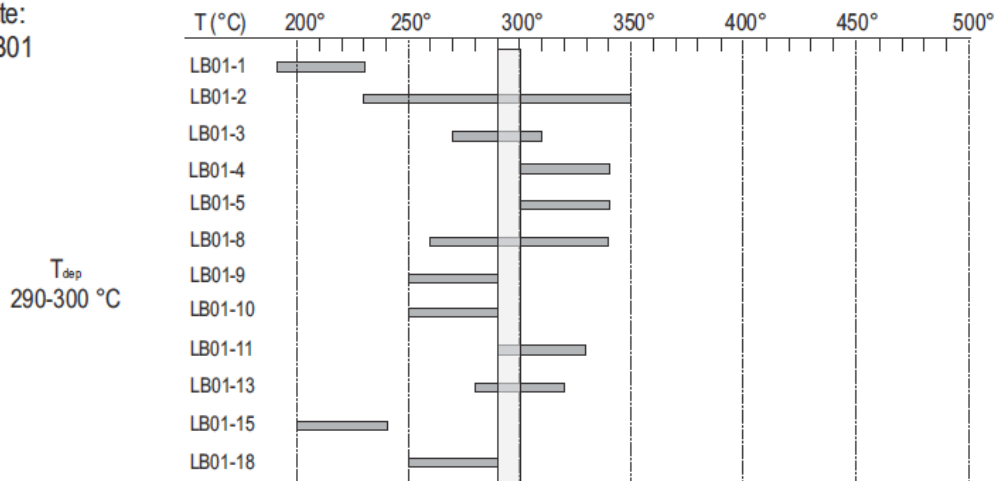

| Specimen | Lithology | T (°C)  | Type | Between-component angle (°) | J/jr | Secondary component direction |
|----------|-----------|---------|------|-----------------------------|------|-------------------------------|
| LB01-1   | lava      | 190-230 | D3   | ?                           | 9    | not oriented                  |
| LB01-2   | lava      | 230-350 | D1   | ?                           | 5    | not oriented                  |
| LB01-3   | lava      | 270-310 | D3   | ?                           | 7    | not oriented                  |
| LB01-4   | lava      | 300-340 | C    | 87                          | 23   | not oriented                  |
| LB01-5   | lava      | 300-340 | C    | 79                          | 20   | not oriented                  |
| LB01-8   | lava      | 260-340 | D1   | 90                          | 33   | not oriented                  |
| LB01-9   | lava      | 250-290 | C    | 38                          | 16   | not oriented                  |
| LB01-10  | lava      | 250-290 | D2   | ?                           | 4    | not oriented                  |
| LB01-11  | lava      | 290-330 | D2   | ?                           | 8    | not oriented                  |
| LB01-13  | lava      | 280-320 | C    | 75                          | 33   | not oriented                  |
| LB01-15  | lava      | 200-240 | C    | 60                          | 7    | not oriented                  |
| LB01-18  | lava      | 240-280 | D3   | ?                           | 36   | not oriented                  |

Site:  
LUM7

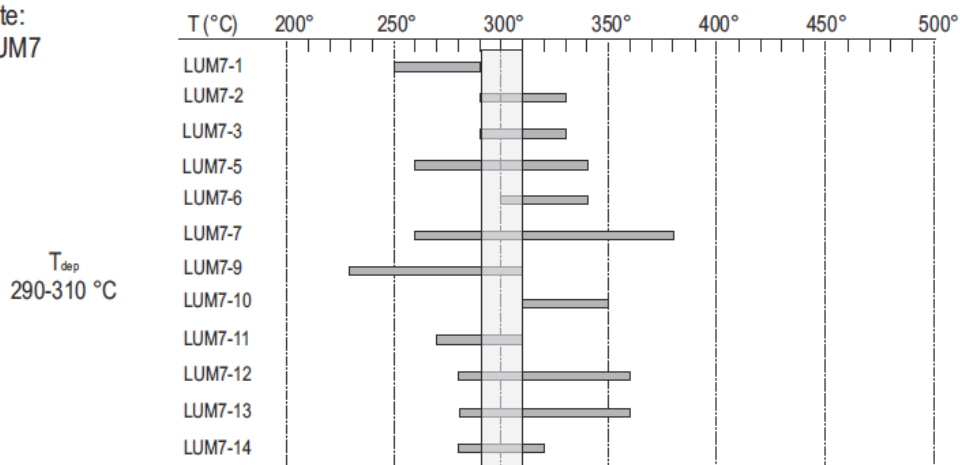

| Specimen | Lithology | T (°C)  | Type | Between-component angle (°) | J/jr | Secondary component direction |
|----------|-----------|---------|------|-----------------------------|------|-------------------------------|
| LUM7-1   | lava      | 250-290 | C    | 90                          | 82   | not oriented                  |
| LUM7-2   | lava      | 290-330 | C    | 40                          | 79   | not oriented                  |
| LUM7-3   | lava      | 290-330 | C    | 135                         | 51   | not oriented                  |
| LUM7-5   | lava      | 260-340 | C    | ?                           | 83   | not oriented                  |
| LUM7-6   | lava      | 300-340 | D3   | 27                          | 44   | not oriented                  |
| LUM7-7   | lava      | 260-380 | D1   | 10                          | 34   | not oriented                  |
| LUM7-9   | lava      | 230-310 | C    | 28                          | 78   | not oriented                  |
| LUM7-10  | lava      | 310-350 | C    | 17                          | 62   | not oriented                  |
| LUM7-11  | lava      | 270-310 | C    | 31                          | 59   | not oriented                  |
| LUM7-12  | lava      | 280-360 | D1   | 5                           | 66   | not oriented                  |
| LUM7-13  | lava      | 280-360 | D3   | 110                         | 68   | not oriented                  |
| LUM7-14  | lava      | 280-320 | D3   | ?                           | 88   | not oriented                  |

Site:  
LB08-2

$T_{dep}$   
310-330 °C

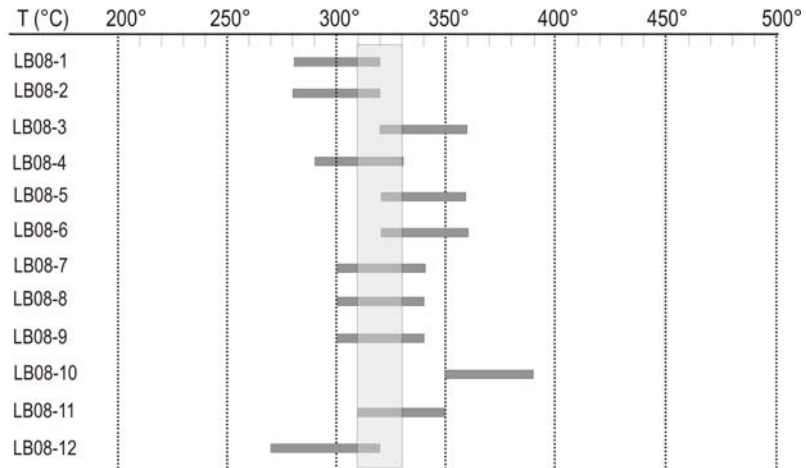

| Specimen | Lithology | T (°C)  | Type | Between-component angle (°) | J/jr | Secondary component direction |
|----------|-----------|---------|------|-----------------------------|------|-------------------------------|
| LB08-1   | lava      | 280-320 | C    | 85                          | 61   | not oriented                  |
| LB08-2   | lava      | 280-320 | D3   | ?                           | 76   | not oriented                  |
| LB08-3   | lava      | 320-360 | C    | ?                           | 47   | not oriented                  |
| LB08-4   | lava      | 290-330 | D1   | ?                           | 44   | not oriented                  |
| LB08-5   | lava      | 290-330 | C    | 90                          | 5    | not oriented                  |
| LB08-6   | lava      | 290-330 | D3   | ?                           | 46   | not oriented                  |
| LB08-7   | lava      | 300-340 | D3   | ?                           | 89   | not oriented                  |
| LB08-8   | lava      | 300-340 | D3   | ?                           | 95   | not oriented                  |
| LB08-9   | lava      | 300-340 | C    | 100                         | 40   | not oriented                  |
| LB08-10  | lava      | 350-390 | D3   | 60                          | 79   | not oriented                  |
| LB08-11  | lava      | 310-350 | D3   | 39                          | 60   | not oriented                  |
| LB08-12  | lava      | 270-310 | C    | 60                          | 76   | not oriented                  |

Site:  
VC4

$T_{dep}$   
250-280 °C

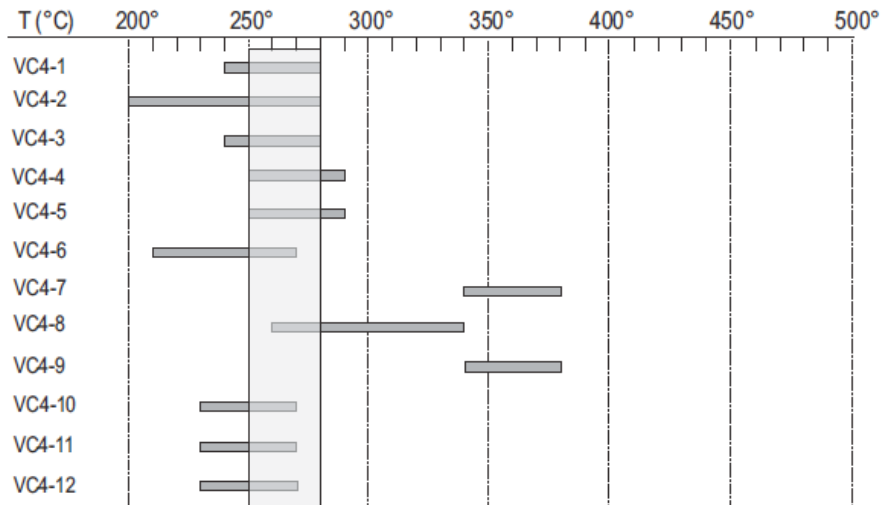

| Specimen | Lithology | T (°C)            | Type | Between-component angle (°) | J/jr | Secondary component direction |
|----------|-----------|-------------------|------|-----------------------------|------|-------------------------------|
| VC4-1    | lava      | 240-280           | C    | 180                         | 88   | not oriented                  |
| VC4-2    | lava      | 200-280           | C    | 25                          | 74   | not oriented                  |
| VC4-3    | lava      | 240-280 (400-440) | C    | 48                          | ?    | not oriented                  |
| VC4-4    | lava      | 250-290           | D2   | ?                           | 2    | not oriented                  |
| VC4-5    | lava      | 250-290           | C    | 93                          | 3    | not oriented                  |
| VC4-6    | lava      | 210-370           | D1   | ?                           | 51   | not oriented                  |
| VC4-7    | lava      | 340-380           | C    | 44                          | 76   | not oriented                  |
| VC4-8    | lava      | 260-340           | D2   | ?                           | 13   | not oriented                  |
| VC4-9    | lava      | 340-380           | D3   | ?                           | 21   | not oriented                  |
| VC4-10   | lava      | 230-270           | C    | 21                          | 72   | not oriented                  |
| VC4-11   | lava      | 230-270           | C    | 88                          | 81   | not oriented                  |
| VC4-12   | lava      | 230-270           | C    | 52                          | 7    | not oriented                  |
